# Supplementary material for: Peanut Stunt Virus and Its Satellite RNA Trigger Changes in Phosphorylation in N. benthamiana Infected Plants at the Early Stage of the Infection
Source: MDPI journal article supplement (doi:10.3390/ijms19103223), 2018-10-18
Supplement: s1 [file s1]

# **Peanut Stunt Virus and its Satellite RNA Trigger Changes in Phosphorylation in *Nicotiana benthamiana* Infected Plants at the Early Stage of the Infection**

## **Supplementary Material**

Barbara Wrzesińska<sup>1</sup>, Lam Dai Vu<sup>2,3,4,5</sup>, Kris Gevaert<sup>4,5</sup>, Ive De Smet<sup>2,3</sup>, Aleksandra Obrepalska-Stepłowska<sup>1,\*</sup>

<sup>1</sup>Institute of Plant Protection – National Research Institute, Department of Entomology, Animal Pests and Biotechnology, Władysława Węgorka 20, 60-318 Poznań, Poland

<sup>2</sup>Ghent University, Department of Plant Biotechnology and Bioinformatics, Technologiepark 927, 9052 Ghent, Belgium

<sup>3</sup>VIB Center for Plant Systems Biology, Technologiepark 927, 9052 Ghent, Belgium

<sup>4</sup>Department of Biomolecular Medicine, Ghent University, B-9000 Ghent, Belgium

<sup>5</sup>VIB Center for Medical Biotechnology, B-9000 Ghent, Belgium

\*Correspondence :

Dr. Aleksandra Obrepalska-Stepłowska

[olaob@o2.pl](mailto:olaob@o2.pl) or [ao.stepłowska@iortib.poznan.pl](mailto:ao.stepłowska@iortib.poznan.pl)

## Table of Contents

|                                                                                                                                                                |    |
|----------------------------------------------------------------------------------------------------------------------------------------------------------------|----|
| <b>Supplementary Figure S1.</b> Accumulation level analysis of PSV-P RNAs and satRNA in <i>N. benthamiana</i> plants infected with PSV-P and PSV-P+satRNA..... | 3  |
| <b>Supplementary Protocol S1.</b> Samples preparation and RT-qPCR procedures.....                                                                              | 4  |
| <b>Supplementary Protocol S2.</b> Mass spectrometry.....                                                                                                       | 5  |
| <b>Supplementary Table S1.</b> Primers used for virus and satellite detection/accumulation measurements by RT-qPCR.....                                        | 6  |
| <b>Supplementary Table S2.</b> Primers used for validation of chosen transcripts from (phospho)proteomic results.....                                          | 7  |
| <b>Supplementary Table S4.</b> (Phospho)proteins found exclusively in one of the conditions during pairwise comparisons.....                                   | 11 |
| <b>References</b> .....                                                                                                                                        | 12 |

**Supplementary Figure S1. Accumulation level analysis of PSV-P RNAs and satRNA in *N. benthamiana* plants infected with PSV-P and PSV-P+satRNA.** *N. benthamiana* plants were infected with biologically infectious transcripts of PSV-P (blue boxes) or PSV-P+satRNA (orange boxes). The RT-qPCR analysis was done to show changes in the levels of PSV-P genomic strands (RNA 1 – q1, RNA 2 – q2a and q2b, RNA 3 – q3a and qCP, and satRNA) between plants infected with virus and satRNA, and virus alone. The error bars represent standard errors; \* - statistically significant results.

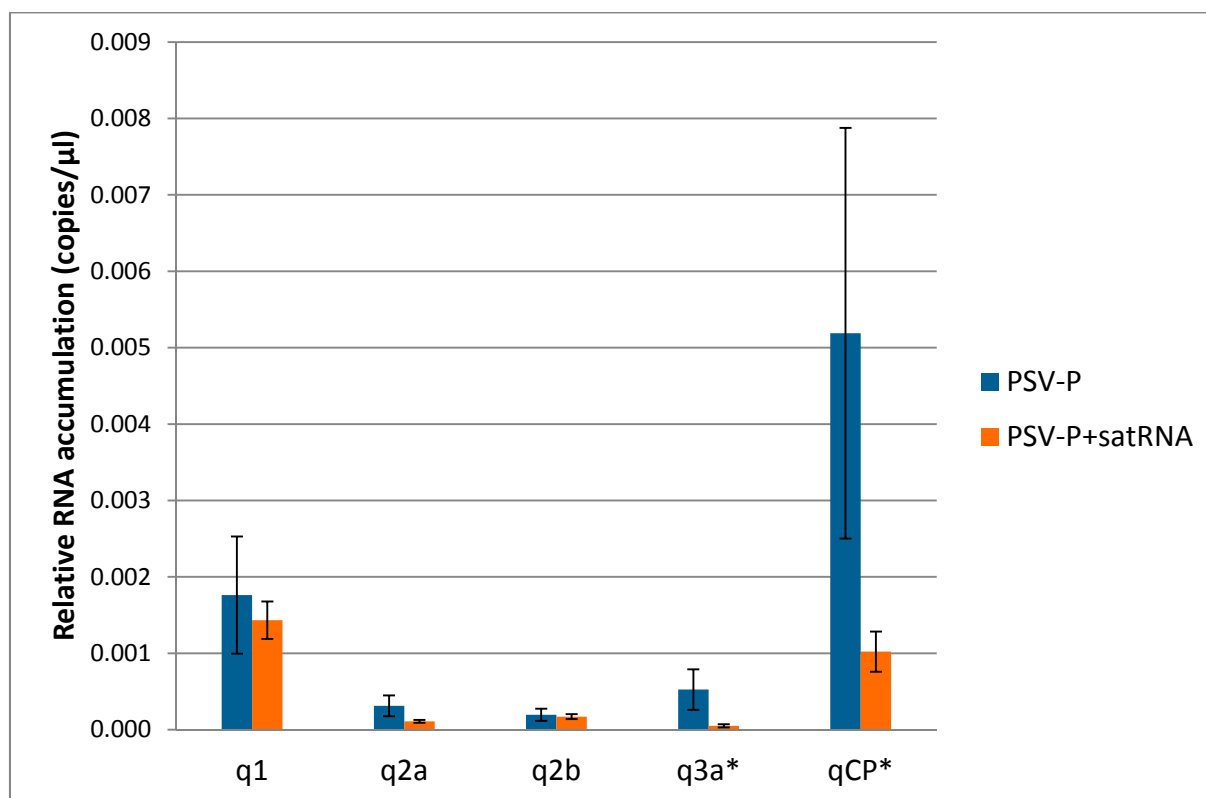

### **Supplementary Protocol S1. Samples preparation and RT-qPCR procedures.**

Total RNA was extracted from the harvested plants using Tri Reagent solution (Thermo Fisher Scientific, Waltham, MA, USA) followed by genomic DNA digestion as previously described [1]. One  $\mu\text{g}$  of purified RNA was reverse transcribed using RevertAid Reverse Transcriptase (Thermo Fisher Scientific) with a random-sequence primer (5'-NNNNNN-3', Thermo Fisher Scientific). The resulted cDNA samples (20  $\mu\text{L}$ ) were diluted with 20  $\mu\text{L}$  DNase-free water and used for RT-qPCR. The reactions were completed in a LightCycler 480 (Roche, Basel, Switzerland). The reaction was conducted in a 10- $\mu\text{L}$  solution using iTaq™ Universal SYBR® Green Supermix (BioRad, Hercules, CA, USA) with 0.5  $\mu\text{M}$  forward and reverse primers, and 1  $\mu\text{L}$  of diluted cDNA. The reaction profile consisted of an initial denaturation step at 95 °C for 3 min, followed by 40 cycles of 95 °C for 20 s, an annealing step for 20 s (temperatures listed in supplemental tables), and 72 °C for 20 s.

## **Supplementary Protocol S2. Mass spectrometry procedure**

Each sample was analyzed via LC-MS/MS on an Ultimate 3000 RSLC nano LC (Thermo Fisher Scientific) in-line connected to a Q Exactive mass spectrometer (Thermo Fisher Scientific). The peptides were first loaded on a trapping column (made in-house, 100  $\mu$ m internal diameter (I.D.)  $\times$  20 mm, 5  $\mu$ m beads C18 Reprosil-HD (Dr. Maisch, Ammerbuch-Entringen, Germany). After flushing the trapping column, peptides were loaded in solvent A (0.1% formic acid in water) on a reverse-phase column (made in-house, 75  $\mu$ m I.D.  $\times$  250 mm, 1.9  $\mu$ m Reprosil-Pur-basic-C18-HD beads, Dr. Maisch, packed in the needle) and eluted by an increase in solvent B (0.1% formic acid in acetonitrile) in a linear gradient from 2% solvent B to 55% solvent B in 120 minutes, followed by a 5-min washing step with 99% solvent B, all at a constant flow rate of 300 nl/min. The mass spectrometer was operated in data-dependent, positive ionization mode, automatically switching between MS and MS/MS acquisition for the 5 most abundant peaks in a given MS spectrum. The source voltage was set at 4.1 kV and the capillary temperature at 275°C. One MS1 scan ( $m/z$  400–2,000, AGC target  $3 \times 10^6$  ions, maximum ion injection time 80 ms), acquired at a resolution of 70,000 (at 200  $m/z$ ), was followed by up to 5 tandem MS scans (resolution 17,500 at 200  $m/z$ ) of the most intense ions fulfilling predefined selection criteria (AGC target  $5 \times 10^4$  ions, maximum ion injection time 80 ms, isolation window 2 Da, fixed first mass 140  $m/z$ , spectrum data type: centroid, under-fill ratio 2%, intensity threshold  $1.3 \times 10^4$ , exclusion of unassigned, 1, 5-8, >8 positively charged precursors, peptide match preferred, exclude isotopes on, dynamic exclusion time 12 s). The HCD collision energy was set to 25% Normalized Collision Energy and the polydimethylcyclsiloxane background ion at 445.120025 Da was used for internal calibration (lock mass).

**Supplementary Table S1. Primers used for virus and satellite detection/accumulation measurements by RT-qPCR.**

| Primer name | Primer sequence (5'-3')      | Annealing temp. [°C] | Function                                                  |
|-------------|------------------------------|----------------------|-----------------------------------------------------------|
| PSVq1       | F:<br>CTTCTGCCCTCGTTGATAAAG  | 57                   | Detection of PSV 1a protein ORF in RT-qPCR [2]            |
|             | R:<br>CATACCGATTTCGAATCACTT  |                      |                                                           |
| PSVq2a      | F:<br>CTTCTAGGTATCCCCGTAAG   | 60                   | Detection of PSV 2a protein ORF in RT-qPCR [2]            |
|             | R:<br>CAAGCACATTGATACCCTATC  |                      |                                                           |
| PSVq2b      | F:<br>CTCMTATCCTCCCAGCTAYAC  | 53                   | Detection of PSV 2b protein ORF in RT-qPCR [2]            |
|             | R:<br>GAATAACTRCCCTCACACCAC  |                      |                                                           |
| PSVq3a      | F:<br>CTAGTCGGACTTTAACACAAC  | 56                   | Detection of PSV 3a protein ORF in RT-qPCR [2]            |
|             | R:<br>ACGCTCATATATCCCTTAGAC  |                      |                                                           |
| PSVqCP      | F:<br>ACACATACTTCGTTGGATG    | 55                   | Detection of PSV coat protein ORF in RT-qPCR [2]          |
|             | R:<br>CCTCWTCTTCGGAAATTCAG   |                      |                                                           |
| PARN A      | 1:<br>GGGAGGGCGGGCGTTCGTAGTG | 60                   | satRNA detection in RT-qPCR [2]                           |
|             | 2: GCCGTGGCCTTTCGTGGTC       |                      |                                                           |
| NbAct       | A:<br>GTGAAGGAGAAGTTGGCTTAC  | 60                   | $\beta$ actin amplification in RT-qPCR [3]                |
|             | 2:<br>CTTCTGGGCAGCGGAATCTC   |                      |                                                           |
| NbEF1a      | F:<br>CACCATTGATATTGCCTTGTG  | 53                   | elongation factor 1 $\alpha$ amplification in RT-qPCR [4] |
|             | R:<br>GTTCTTGATAAAGTCCCTGTG  |                      |                                                           |

**Supplementary Table S2. Primers used for validation of chosen transcripts from (phospho)proteomic results** (\* - primers for 40S ribosomal protein S6 and tetratricopeptide repeat (TPR)-like superfamily protein genes, which hits were found to be statistically significant in both proteomic and phosphoproteomic analysis).

| Primer name         | Primer sequence (5'-3')         | Annealing temp. [°C] | Amplicon length [bp] | Gene annotation with SolGenomics accession number                 |
|---------------------|---------------------------------|----------------------|----------------------|-------------------------------------------------------------------|
| Proteome validation |                                 |                      |                      |                                                                   |
| NbAGO4              | F:<br>TGAAGAAAAAGGCGGCTC<br>TA  | 61                   | 119                  | protein argonaute 4<br>(Niben101Scf05519g01007.1)                 |
|                     | R:<br>GTGTCCATCCACATTGGTC<br>A  |                      |                      |                                                                   |
| NbBIP               | F:<br>GCTGAAGACAAAGCCTCTG<br>G  | 61                   | 119                  | heat shock-related 70 kDa protein 2<br>(Niben101Scf03115g02008.1) |
|                     | R:<br>TCCTCCTCTGCAAACCTCCT<br>C |                      |                      |                                                                   |
| NbERG3              | F:<br>GGAAGGGTTGTGAACCTG<br>AA  | 61                   | 113                  | elicitor-responsive protein 3<br>(Niben101Scf09044g01005.1)       |
|                     | R:<br>GAAGTCGTCTTCGCCTACA<br>GA |                      |                      |                                                                   |
| NbGRP2              | F:<br>ATTCGGTACATACGGCGAA<br>G  | 56                   | 115                  | glycine-rich RNA-binding protein 2<br>(Niben101Scf03214g00006.1)  |
|                     | R:<br>AGCATCCCTCATGCATTTC<br>T  |                      |                      |                                                                   |
| NbMCA               | F:                              | 57                   | 120                  | metacaspase-4 (Niben101Scf01376g04029.1)                          |

|                            |                                |    |     |                                                                                   |
|----------------------------|--------------------------------|----|-----|-----------------------------------------------------------------------------------|
|                            | CAAATCCTTGCCTCTTTCC<br>A       |    |     |                                                                                   |
|                            | R:<br>GGACTAGCATCTTCGCCAA<br>A |    |     |                                                                                   |
| NbPR2B                     | F:<br>CCCAATTCAGATGTGAAGC<br>A | 56 | 124 | glucan endo-1,3-beta-glucosidase B<br>(Niben101Scf01934g02004.1)                  |
|                            | R:<br>TGATTTCATTCCCAACAGC<br>A |    |     |                                                                                   |
| NbPSB                      | F:<br>CTTCTTGGTGCAAGTGGTG<br>A | 57 | 106 | proteasome subunit beta<br>(Niben101Scf15836g03007.1)                             |
|                            | R:<br>GACCCAAAGAGTTCCCATC<br>A |    |     |                                                                                   |
| Phosphoproteome validation |                                |    |     |                                                                                   |
| NbAGO1B                    | F:<br>AGACAACCACTGGGTGAA<br>GG | 60 | 152 | protein argonaute 1B<br>(Niben101Scf05146g06007.1)                                |
|                            | R: TTCAGAAGCTGGCTCAC<br>AAA    |    |     |                                                                                   |
| NbBSL3like                 | F:<br>GATGGATGGCTTTGAACGA<br>T | 60 | 150 | serine/threonine protein phosphatase family<br>protein (Niben101Scf04699g00014.1) |
|                            | R:<br>GGTGGCAATGGGTGAATA<br>AG |    |     |                                                                                   |
| NbECT5                     | F:<br>CCCGTGGACTCTGGAAGAT      | 60 | 152 | evolutionarily conserved C-terminal region 5<br>(Niben101Scf08176g00008.1)        |



|            |                                |    |     |                                                                          |
|------------|--------------------------------|----|-----|--------------------------------------------------------------------------|
|            | A                              |    |     |                                                                          |
|            | R:<br>GAATAATGCCTGGCTGAGG<br>A |    |     |                                                                          |
| NbEIF5     | F:<br>AGGAAGATGGTTCGCAGCT<br>A | 60 | 192 | eukaryotic translation initiation factor 5<br>(Niben101Scf01393g01005.1) |
|            | R:<br>TCCAGATTGGGGAGAGTTT<br>G |    |     |                                                                          |
| NbFBP2like | F:<br>CCTAAAACAATGGCCGAA<br>GA | 60 | 154 | polyribonucleotide nucleotidyltransferase<br>(Niben101Scf00394g03001.1)  |
|            | R:<br>GAGCACCATCAGGAGGAG<br>AG |    |     |                                                                          |
| NbPGM1     | F:<br>AAAGGTGCTACGCTTGTGG<br>T | 60 | 149 | phosphoglucomutase-1<br>(Niben101Scf01697g23018.1)                       |
|            | R:<br>ACAGCTGATACGGCAGGA<br>GT |    |     |                                                                          |
| NbPMI1     | F:<br>CTCGCTCACATTGGTAAGC<br>A | 60 | 156 | plastid movement impaired1<br>(Niben101Scf03738g00006.1)                 |
|            | R:<br>TCTGGATGGCATGGTTTGT<br>A |    |     |                                                                          |
| NbPPC1     | F:<br>AGCGTGGCAGCTGTATAAG<br>G | 63 | 151 | phosphoenolpyruvate carboxylase 1<br>(Niben101Scf25430g00015.1)          |

|                     |                                  |    |     |                                                                                       |
|---------------------|----------------------------------|----|-----|---------------------------------------------------------------------------------------|
|                     | R:<br>TGTATCGGGTGGTTGAGAC<br>A   |    |     |                                                                                       |
| NbRPN10             | F:<br>CGAGTTTCAATGGAGGAG<br>GA   | 60 | 152 | 26S proteasome non-ATPase regulatory subunit<br>4 homolog (Niben101Scf06856g00007.1)  |
|                     | R:<br>GCCTTGTTTTTCAGGTTTCAG<br>G |    |     |                                                                                       |
| NbRS6*              | F:<br>ATCGACGACGACCAGAAA<br>CT   | 63 | 147 | 40S ribosomal protein S6<br>(Niben101Scf01293g03017.1)                                |
|                     | R:<br>TCCCTGCTTCATTGGAAAA<br>C   |    |     |                                                                                       |
| NbTPR-<br>like1320* | F:<br>GGACAAAACCGTTCATTG<br>G    | 60 | 149 | tetratricopeptide repeat (TPR)-like superfamily<br>protein (Niben101Scf02283g00007.1) |
|                     | R:<br>GCCTTCGTCTTCGTCCATA<br>G   |    |     |                                                                                       |
| NbTSJT1             | F:<br>TCCGAACAATGAGACAGC<br>AG   | 63 | 151 | aluminium induced protein with YGL and LRDR<br>motifs (Niben101Scf10940g04023.1)      |
|                     | R:<br>CCTGGGAAGAAGAGGGTT<br>TT   |    |     |                                                                                       |

**Supplementary Table S4. (Phospho)proteins found exclusively in one of the conditions during pairwise comparisons.** PSV-P-responsive, PSV-P+satRNA-responsive, and satRNA-responsive (phospho)proteins extracted by comparison of (phospho)proteomes of PSV-P with MOCK, PSV-P+satRNA with MOCK, and PSV-P+satRNA with PSV-P, respectively.

| Treatment                      | Proteome |      | Phosphoproteome |      | Phosphoproteome after normalization |      |
|--------------------------------|----------|------|-----------------|------|-------------------------------------|------|
|                                | UP       | DOWN | UP              | DOWN | UP                                  | DOWN |
| <b>PSV-P-responsive</b>        | 68       | 32   | 4               | 205  | 5                                   | 161  |
| <b>PSV-P+satRNA-responsive</b> | 33       | 28   | 15              | 10   | 1                                   | 7    |
| <b>satRNA-responsive</b>       | 40       | 168  | 203             | 7    | 165                                 | 5    |

## References

1. Wielkopolan, B.; Krawczyk, K.; Obrępańska-Stęplowska, A. Gene expression of serine and cysteine proteinase inhibitors during cereal leaf beetle larvae feeding on wheat: the role of insect-associated microorganisms. *Arthropod-Plant Interactions* **2018**, 1-12.
2. Obrępańska-Stęplowska, A.; Renaut, J.; Planchon, S.; Przybylska, A.; Wieczorek, P.; Barylski, J.; Palukaitis, P. Effect of temperature on the pathogenesis, accumulation of viral and satellite RNAs and on plant proteome in peanut stunt virus and satellite RNA-infected plants. *Frontiers in Plant Science* **2015**, 6, doi:10.3389/fpls.2015.00903.
3. Obrępańska-Stęplowska, A.; Wieczorek, P.; Budziszewska, M.; Jeszke, A.; Renaut, J. How can plant virus satellite RNAs alter the effects of plant virus infection? A study of the changes in the *Nicotiana benthamiana* proteome after infection by *Peanut stunt virus* in the presence or absence of its satellite RNA. *Proteomics* **2013**, 13, 2162-2175.
4. Obrępańska-Stęplowska, A.; Zmienko, A.; Wrzesińska, B.; Goralski, M.; Figlerowicz, M.; Zypřych-Walczak, J.; Siatkowski, I.; Pospieszny, H. The defense response of *Nicotiana benthamiana* to peanut stunt virus infection in the presence of symptom exacerbating satellite RNA. *Viruses* **2018**, 10, 449.
